# Supplementary material for: Using the incidence and impact of behavioural conditions in guide dogs to investigate patterns in undesirable behaviour in dogs
Source: PubMed Central journal article supplement (PMC4831008; doi:10.1038/srep23860), 2016-04-14
Supplement: srep23860-s1.pdf [file srep23860-s1.pdf]

# Using the incidence and impact of behavioural conditions in guide dogs to investigate undesirable behaviours in working dogs

Geoffrey Caron-Lormier<sup>1</sup>, Naomi D. Harvey<sup>1</sup>, Gary C.W. England<sup>1</sup>, and Lucy Asher<sup>2</sup>

<sup>1</sup>School of Veterinary Medicine and Science, University of Nottingham, Sutton Bonington Campus, Leicestershire, LE12 5RD, UK

<sup>2</sup>Centre for Behaviour and Evolution, Henry Wellcome Building, Newcastle University, Newcastle, NE2 4HH, UK.

Table 1: Results of the  $\chi^2$ -test for each of the variable PureBreed, Breed, Dog Sex, and Outside Bred. The variable PureBreed, the temperamental groups Body Sensitivity and Distraction were removed from the table as they returned no significant results. The values in bracket are the  $\chi^2$  and the degrees of freedom. Non-significant results ( $P > 0.05$ ) are shown as NS.

| Withdrawal Group       | Sex            | Breed             |
|------------------------|----------------|-------------------|
| Attentiveness          | NS (0.72,1)    | 0.021 (14.87,6)   |
| Chasing                | 0.009 (6.78,1) | 0.016 (15.68,6)   |
| Environmental Anxiety  | NS (0.1,1)     | 0.011 (16.46,6)   |
| Excitability           | NS (0.02,1)    | 0.03 (14,6)       |
| Fear/Aggression        | 0.008 (6.95,1) | <0.001 (106.43,6) |
| Retired                | NS (1.98,1)    | <0.001 (48.85,6)  |
| Social Behaviour       | NS (0.45,1)    | NS (10.81,6)      |
| Willingness/Confidence | NS (2.09,1)    | NS (8.16,6)       |

Table 2: Coefficients, and associated statistics, for the best least-squares regression of the working life showing the reduction in working life associated with each withdrawal and breed groups

| Factor                           | Estimate | S.E.  | t.value | p.value |
|----------------------------------|----------|-------|---------|---------|
| Reference: Retired Labs          | 3108     | 7.343 | 423.3   | <0.001  |
| Behaviour:Attentiveness          | -2124    | 91.82 | -23.13  | <0.001  |
| Behaviour:Chasing                | -2153    | 64.76 | -33.24  | <0.001  |
| Behaviour:Distraction            | -1993    | 101.4 | -19.66  | <0.001  |
| Behaviour:Environmental Anxiety  | -1891    | 42.08 | -44.94  | <0.001  |
| Behaviour:Excitability           | -1973    | 132.2 | -14.93  | <0.001  |
| Behaviour:Fear/Aggression        | -2264    | 47.55 | -47.61  | <0.001  |
| Behaviour:Social Behaviour       | -2010    | 72.91 | -27.56  | <0.001  |
| Behaviour:Willingness/Confidence | -1584    | 49.26 | -32.15  | <0.001  |
| Breed:Other                      | -6.671   | 17.82 | -0.374  | 0.708   |
| Breed:GSD                        | -172.6   | 25.79 | -6.693  | <0.001  |
| Breed:GR                         | -35.96   | 15.3  | -2.35   | 0.019   |
| Breed:GRxL                       | 10.32    | 11.14 | 0.927   | 0.354   |
| Breed:LxGR                       | 27.64    | 16.2  | 1.706   | 0.088   |
| Breed:LxGR*                      | -23.79   | 25.81 | -0.922  | 0.357   |

Table 3: Withdrawal reasons and associated numbers for the Old withdrawal group

| Withdrawal reason | Number |
|-------------------|--------|
| old               | 6465   |

Table 4: Withdrawal reasons and associated numbers for the Attentiveness withdrawal group

---

| Withdrawal reason                   | Number |
|-------------------------------------|--------|
| attentiveness - low - task focus    | 47     |
| attentiveness - low - handler focus | 29     |

---

Table 5: Withdrawal reasons and associated numbers for the Chasing withdrawal group

---

| Withdrawal reason                    | Number |
|--------------------------------------|--------|
| distraction - high [animals - birds] | 128    |

---

Table 6: Withdrawal reasons and associated numbers for the Distraction withdrawal group

---

| Withdrawal reason                  | Number |
|------------------------------------|--------|
| distraction - high - general       | 33     |
| distraction - high [objects -food] | 22     |
| distraction - high - sounds        | 4      |
| distraction - high - people        | 2      |
| distraction - high - scents        | 2      |

---

Table 7: Withdrawal reasons and associated numbers for the Environmental Anxiety withdrawal group

---

| Withdrawal reason       | Number |
|-------------------------|--------|
| stress resilience - low | 178    |

---

| Withdrawal reason               | Number |
|---------------------------------|--------|
| suspicion - high - sounds       | 47     |
| suspicion - high - general      | 43     |
| confidence - low - adaptability | 29     |
| suspicion - high - objects      | 24     |

Table 8: Withdrawal reasons and associated numbers for the Excitability withdrawal group

| Withdrawal reason                             | Number |
|-----------------------------------------------|--------|
| social behaviour [hyperactivity - boisterous] | 36     |

Table 9: Withdrawal reasons and associated numbers for the Fear/Aggression withdrawal group

| Withdrawal reason          | Number |
|----------------------------|--------|
| aggression - people        | 114    |
| aggression - animals       | 103    |
| suspicion - high - people  | 6      |
| suspicion - high - animals | 3      |

Table 10: Withdrawal reasons and associated numbers for the Social Behaviour withdrawal group

| Withdrawal reason                              | Number |
|------------------------------------------------|--------|
| social behaviour [spending - spends indoor]    | 50     |
| other - unacceptable post qualification habits | 48     |
| social behaviour [scavenge - scrounger]        | 24     |

| Withdrawal reason                  | Number |
|------------------------------------|--------|
| social behaviour - destructive     | 12     |
| social behaviour ? coprophagia     | 6      |
| social behaviour - noisy when left | 4      |

Table 11: Withdrawal reasons and associated numbers for the Willingness/Confidence withdrawal group

| Withdrawal reason                | Number |
|----------------------------------|--------|
| willingness - low                | 290    |
| confidence - low decision making | 21     |
